# Supplementary material
Source: PubMed Central journal article supplement (PMC5098666)
Supplement: pnas.1612161113.sapp.pdf [file pnas.1612161113.sapp.pdf]

## Supporting Information – Appendix

### Capture of micrococцин biosynthetic intermediates reveals C-terminal processing as an obligatory step for *in vivo* maturation

Kathryn D. Bewley<sup>a,1</sup>, Philip R. Bennallack<sup>b,1</sup>, Mark A. Burlingame<sup>a</sup>, Richard A. Robison<sup>b</sup>, Joel S. Griffitts<sup>b</sup>, and Susan M. Miller<sup>a,2</sup>

<sup>a</sup>Department of Pharmaceutical Chemistry, University of California-San Francisco, San Francisco, CA 94158; <sup>b</sup>Department of Microbiology and Molecular Biology, Brigham Young University, Provo, UT 84602; <sup>1</sup>K.D.B and P.R.B contributed equally to this work. <sup>2</sup>Correspondence should be addressed to Susan Miller, Susan.MillerPhd@ucsf.edu

#### SI Materials and Methods

##### Construction, expression and purification of *E. coli*-produced GST-TcIE

To optimize conditions for expression and analysis of the precursor peptide (TcIE), a GST-TcIE translational fusion was created by overlap-extension PCR and introduced into the high copy *E. coli* expression vector (pJG542) under control of an IPTG-inducible promoter. The glutathione S-transferase (GST) encoding gene was sourced from pGEX-4T-1 (GE Life Sciences, Marlborough, MA, USA) and amplified using oPB281 and oPB288 (Table S2). The *tclE* gene was amplified from pBac115 (1) using oPB282 and oPB289. Once assembled and the sequence verified, expression of GST-TcIE was achieved by transforming the construct into Rosetta 2(DE3) pLysS cells (EMD Biosciences), inoculating a single colony into a 25 mL overnight culture (LB media, 37 °C, carbenicillin 100 mg/L and chloramphenicol 34 mg/L) followed by inoculation into a 1-L fermentation flask (LB media, 37 °C, carbenicillin 100 mg/L and chloramphenicol 34 mg/L). Cells were grown until the OD<sub>600</sub> = 0.6-0.65 upon which 0.25 mM IPTG was added to induce expression for 3 hours at 37 °C. The cells were then pelleted, and GST-TcIE was purified as described for GST-TcIE peptides isolated from *B. subtilis* mutant strains.

##### Purification of processed peptide intermediates.

For each *B. subtilis tcl* mutant or deletion strain, a single colony was grown overnight in LB medium (25 ml, 37 °C, 200 rpm) with spectinomycin (80 mg/L). This was used to inoculate LB medium (1 L, 37 °C, 200 rpm, 16 h or 8 h) with spectinomycin (80 mg/L) and xylose (1%) to induce production of the biosynthetic enzymes. Cells were harvested by centrifugation for 15 min at 7,878 × g. Cell pellets were frozen for later use. Thawed pellets were resuspended in 50 mM sodium phosphate buffer with 100 mM NaCl, pH 7.5 (NaPiCl). DNase and a protease inhibitor tablet (Roche) were added, and the cells were sonicated for 2 min (duty cycle, 50%; output, 6) on ice using a Branson Sonifier 450, followed by centrifugation for 20 min at 32,539 × g. The clarified supernatant was incubated with glutathione resin (1 mL of resin per liter of culture) for 30 min with gentle shaking at room temperature. The slurry was collected by centrifugation for 5 min at 700 × g. The resin was washed with 3 × 10 mL of NaPiCl, centrifuging after each wash. To elute the GST-peptide, the resin was incubated with 4 × 1 mL of 50 mM Tris HCl, pH 8 with 10 mM reduced glutathione for 10 min at room temperature before centrifuging. The combined 4 mL of elution supernatant was syringe filtered to remove any remaining resin beads and was then concentrated using a 10 kDa MW cutoff Amicon spin filter (2,600 × g). The concentrated GST-peptide was buffer exchanged into 10 mM NaPi, pH 7.5 buffer using the same Amicon spin filter, concentrated to <100 µL, aliquoted and frozen at -80 °C. For ΔTclM strains only,

tobacco etch virus (TEV) protease cleavage of the peptide was carried out on the resin. To do this, 20  $\mu\text{g}$  of TEV protease in 1 mL of NaPiCl containing 0.5 mM dithiothreitol (DTT) was added and incubated at room temperature for 1 h. The resin was centrifuged and supernatant was collected. The resin was washed with  $2 \times 1$  mL of NaPiCl without DTT or protease. The 3 mL were combined, filtered and concentrated to  $<100 \mu\text{L}$  with a 3 kDa MW cutoff Amicon spin filter, aliquoted and frozen at  $-80 \text{ }^\circ\text{C}$ .

### **Alignments and Data Analysis**

The structural alignments generated by HHpred are displayed in this Appendix using JalView (2). The structural models from Modeller were overlaid with their template structures using Chimera (3) and its MatchMaker feature, but ultimately illustrated in this Appendix using Pymol (PyMOL Molecular Graphics System, Version 1.7.4.1 Schrödinger, LLC.). The alignment of TcIM and its homologues was generated with Clustal Omega (4) and displayed using JalView. Deconvolution of ESI-MS data was achieved with MagTran (The Magic Transformer), a software package based on the Zscore algorithm (5).

**Fig. S1. Comparison of Tcl proteins from *M. caseolyticus* 115 and *B. cereus* ATCC 14579.** (A) Alignment of TcIE precursor peptides from *B. cereus* and *M. caseolyticus*. The core peptide is shown in red, and the leader peptide is shown in black. (B) The predicted functions of micrococцин biosynthetic proteins from *B. cereus* (*Bc*) and *M. caseolyticus* (*Mc*).

A

*B. cereus* ATCC 14579: MGSEIKKALNTLEIEDFDIAIEMVDVDAMPENEALEIMGASCTTCVCTCSCCTT  
*M. caseolyticus* str. 115: MGSEFQTNNIEGLDVTDLDFISEEVTEKDEKEIMGASCTTCVCTCSCCTT

B

| <i>Mc</i> Gene Product<br>(size, aa,<br>GenBank ID) | <i>Bc</i> Gene Product<br>(size, aa,<br>GenBank ID) | Predicted function        | Identity/similarity/<br>coverage % <sup>a</sup> |
|-----------------------------------------------------|-----------------------------------------------------|---------------------------|-------------------------------------------------|
| TclI (242)<br>AIU53944.1                            | TclI (503)<br>AAP11955.1                            | Ocin-ThiF-like protein    | 36/45/23                                        |
| TclJ (563)<br>AIU53945.1                            | TclJ (660)<br>WP_001031656.1 <sup>b</sup>           | TOMM cyclodehydratase     | 35/50/87                                        |
| TclK (843)<br>AIU53946.1                            | TclK (871)<br>AAP11953.1                            | dehydratase               | 28/47/92                                        |
| TclL (267)<br>AIU53947.1                            | TclL (323)<br>AAP11952.1                            | dehydratase               | 28/45/95                                        |
| TclM (264)<br>AIU53948.1                            | TclM (325)<br>AAP11951.1                            | aza-Diels-Alderase        | 32/52/79                                        |
| TclN (447)<br>AIU53949.1                            | TclN (522)<br>AAP11950.1                            | McbC-type dehydrogenase   | 25/43/95                                        |
| TclP (232)<br>AIU53950.1                            | TclP (256)<br>AAP11948.1                            | Short-chain dehydrogenase | 38/57/99                                        |
| TclS (223)<br>AIU53941.1                            | TclS (237)<br>AAP11945.1                            | Short-chain dehydrogenase | 23/44/81                                        |

<sup>a</sup> Identity, similarity and coverage % numbers are based on a blastp comparison of *B. cereus* ATCC 14579 and *M. caseolyticus* str. 115 *tcl* gene products.

<sup>b</sup> There is some discrepancy in the length of *Bc*TclJ. It was originally deposited as BC5085 (547 aa), but it was later determined this was an N-terminal truncation and *Bc*TclJ is actually longer (660 aa). The 547 aa version has the GenBank ID AAP11954.1, while the 660 aa version has GenBank ID WP\_001031656.1.

**Fig. S2. Integration plasmids and GST-TclE precursor peptide gene/protein sequences.** (A) Plasmid map of pLEGO harboring the biosynthetic genes (*tcI/JKLMNPS*) for expression with a xylose-inducible promoter after integration into the *amyE* locus of *B. subtilis* (6). (B) Plasmid map of pTclE\_GST, for *thrC* integration and constitutive expression of the precursor peptide, TcIE. A TEV-cleavage site was engineered between the N-terminal GST tag and TcIE. (C) DNA sequence of the TEV-TcIE portion of GST-TcIE (spacer regions = lower case, TEV recognition site = underlined yellow highlight, TcIE = grey highlight) and the resulting peptide after TEV cleavage (core peptide = underlined). The sequence of the untagged precursor peptide (TcIE) is shown for comparison.

A

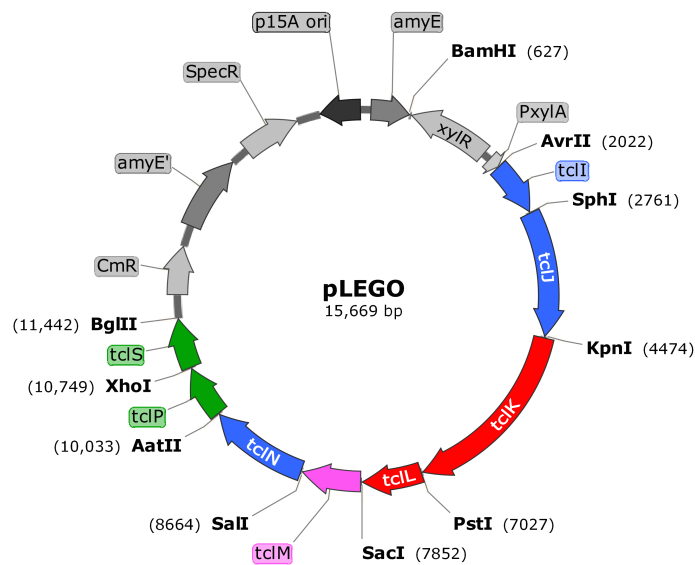

B

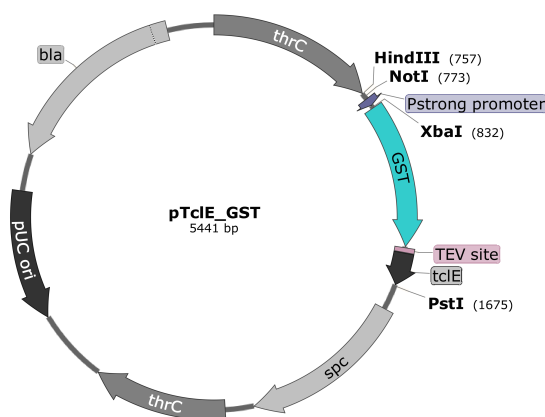

C

---Glutathione-S-transferase---ggagga**GAAAACCTGTATTTTCAAGGC**ggaTCAGAAATCCAAACAAACAATA  
 TCGAAGGTTTAGATGTCAGTGAAGAAGTTACTGAAAAAGACGAGAAAGAAATCATGGGTGCTTCT  
 TGTACTACATGTGTTGTACATGCAGTTGTTGTACAACCTAA

GST-TcIE Post TEV cleavage: GGSEFQTNNIEGLDVTDLDFISEEVTEKDEKEIMGASCTTCVCTCSCCTT  
 Untagged TcIE: MSEFQTNNIEGLDVTDLDFISEEVTEKDEKEIMGASCTTCVCTCSCCTT

**Fig. S3. TclJ alignment and structural model.** (A) TclJ is predicted to have a structure similar to ~450 residues of the C-terminus of LynD (PDB: 4V1T). The HHpred alignment of TclJ and LynD (probability >99%) identifies two conserved sequences involved in Mg<sup>2+</sup> binding in the active site of LynD (LynD numbering): 423 EAXER 427, 548 EXXER 552; as well as a conserved C-terminus (572 PXPFF 575) that also lies in the active site (7). The red asterisk (\*) shows the predicted Mg-binding residue in TclJ (E319) mutated in this study. (B) Overlay of the Modeller structure of TclJ (magenta) derived from the HHpred alignment with LynD (cyan). Residues 107-562 of TclJ comprise the predicted globular domain with the catalytic active site. The disparate size and large gaps in sequences between the N-termini of the two proteins gives less confidence in the predicted structure of the ~100 N-terminal residues of TclJ. (C) Close up of the ATP binding site in LynD (cyan) overlaid with TclJ (magenta): ADP (green), phosphate (orange), Mg<sup>2+</sup> (grey spheres), and E548/E319 (cyan/magenta) (7). E548/E319 is from one of the two conserved EXXER motifs, which have been shown to coordinate Mg<sup>2+</sup> in the homologous BalhD protein (8).

A

```

TclJ   4 FESPEFNI IRYLSN SYI--FK-STSKPEDFLNS IKER ILLNTN----- 43
4V1T  174 LESQQTWLLVKPVG SVLWLVGPV FVPGKTCGWDC LAHR LRG NREVEASVLRQKQAQQQRNGQSGSV 238

TclJ   44 -----DI IYKKNIPERNI SFLSRIENSIGNF IC-----NQ I-----SEYDY I IYIYNHKT 88
4V1T  239 IGCLPTAR-----ATLP STLTQTGLQFAATE IAKWIVKYHV NATAPGTVFFPTLDGKI IITLNHSI 297

TclJ   89 NK I KKVNYF I SPHYKK-L PND-- --TTNCFN I I INELKN--SKSHNFR SRNIDS IYNQLDKYFLD 147
4V1T  298 LDLKSHIL I KR SQCPTCGD P K I LQHRGFEP LKLESRP KQFT SDG- GHR GTTPEQTVQKY-QHLIS 360

TclJ   148 KNLG I C N M L LDNYD--G-PFP I SV AMLP LDN-----GKEEPGV GRTRK IQR SRAVAL LEAY 200
4V1T  361 PVTG VVTE L VRIT DPANP LVHTYR AGHSFGSATSLRGLRNT LKHKSS CKGKTDSSKASGLCEAV 425

TclJ   201 ERYSG LEP RGKKT I NHT E--D LKSKKVN MNS L I LHNNP FL I SHG I KN-----SNFTY--ND 252
4V1T  426 ERYSG I FQGD- EPRKRAT LAE L GD L A I HP EQCLCFSDG-----QYAN RETLNEQATVAHDWIPQR 484

TclJ   253 -LLDNE I SWVKCLN LNTFQTL L I PEQYAY Y GINI SNHKEK AINI AYE I SNGCSV GNNYL E VVY Y G 316
4V1T  485 FDASQA I EWTPVWSL TEQTHKY LPTALCY Y HYP LP----PEHR FARGD SNGNAAGNTLEE A I LQG 545

TclJ   317 LMEVI * ERD SFLCSWY FNTPKDK I S LKNASTS IKNL I QQF TSY Y N DYK L ELFY LYNEFN I P VV L AT 381
4V1T  546 FMELV ERD GVALWY Y N R LRRP AVD L GSFNEPY FVQL QQFYR- ENDRD LWVLD L TADLGI P AFAGV 609

TclJ   382 VTLK ESSTK K M N F M C A A A A D I N I E D A I E K S I H E I G G I L F G L N K K F I D R Y H E L E A I R K N N L D V K T M 446
4V1T  610 SNRKTG--SSERL I LGFG A HLDPT I A I LRAVT EVNQ I G L E L D K V P D E---N L K S D A T D W L I T E K L 669

TclJ   447 EDHTLVYGLPEHRTYIQQKMNYENIYDYDKEL--TPKIF Y KEVQKLIKKI-STTKDI L LV DQT P L 508
4V1T  670 ADHPYLLPDT-----TQPLKTAQDYPKRWSDDI Y TDV MTCVNI AQQAGLET L V I DQ T R P 723

TclJ   509 I SKK I D L K V G K I I V P G L L P M T F G K Y N I R V S E N R Y-----H E L C H F Y - S - K D L I I D L N P H P F 562
4V1T  724 D I --- G L N V V K V T V P G M R H F W S R-----F G E G R L Y D V P V K L G W L D E P L T E A Q M N P T P M P F 775

```

B

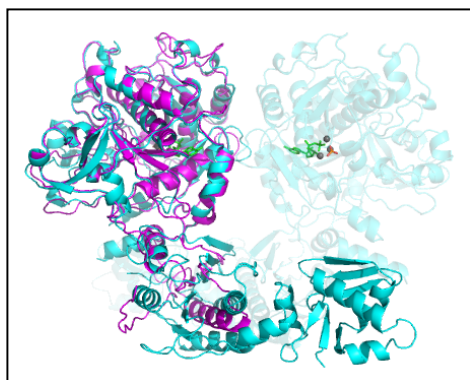

C

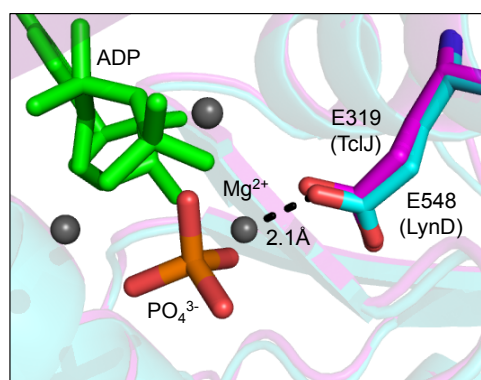



B

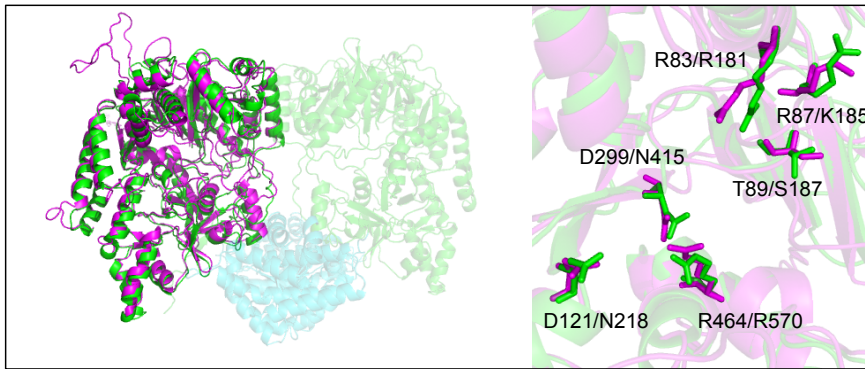

C

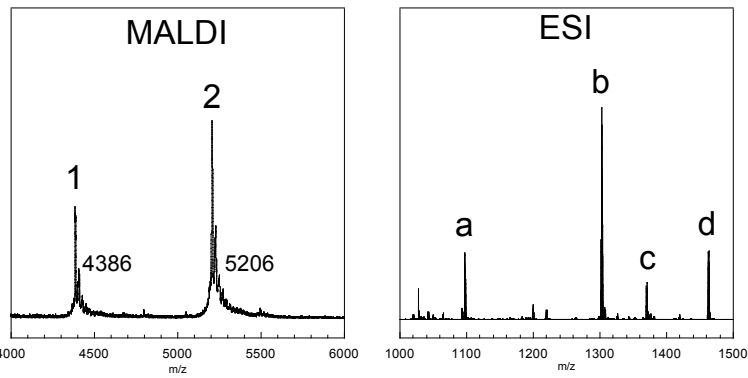

D

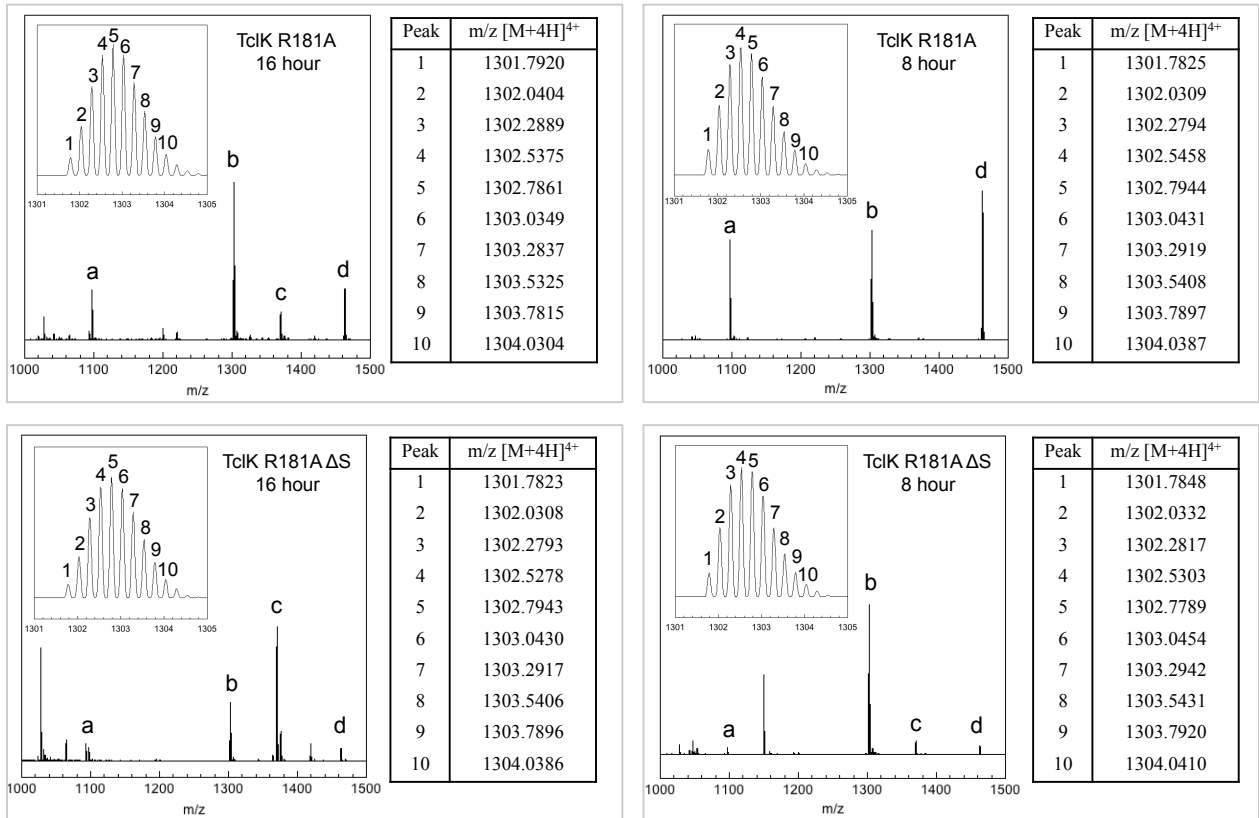



**Fig. S5. TcIL structural modeling and expanded mass spectrometry data for modified TcIE from the TcIL-defective strains.** (A) HHpred alignment of TcIL with the C-terminal ~250 amino acids of NisB (PDB: 4WD9; probability >99%). Key residues identified in this domain of NisB as important for elimination of glutamic acid from glutamylated Ser and Thr residues to form dehydroalanines and dehydrobutyrines, respectively, are marked (\*) (9, 11). A TcIL R49A (\*) mutation was used in this study to abolish enzyme activity resulting in the buildup of glutamylated peptide. (B) (left & middle) Overlay of the TcIL structural model (Modeller) from the HHpred alignment (magenta) with the NisB dimer (green = N-term, cyan = C-term). (right) Close up showing alignment of key (\*) residues (TcIL – magenta, NisB – cyan). (C) MALDI-MS data for modified peptide from 16-h culture of TcIL R49A mutant. (inset) Expanded view of lower intensity ion peaks: 2 Glu ( $m/z$  5464, calc.  $m/z$  5465.9), 3 Glu ( $m/z$  5595, calc.  $m/z$  5595.0), and 4 Glu (calc.  $m/z$  5724.1, barely above the noise). (D) Comparison of MALDI-MS data for processed peptides from TcIL R49A and  $\Delta$ TcIL strains. TEV-cleaved peptide from  $\Delta$ TcIL strain shows a simplified set of peaks, missing the lower ( $-18$ )  $m/z$  peak (\*) that most likely arises from weak elimination activity of TcIL R49A toward a single glutamylated Ser or Thr residue, which was also observed with the corresponding mutation in NisB (9). Data indicate TcIL is not required to form a complex with TcIK (or TcIJNP) since all other modifications are the same in the two strains. (E) ESI-MS data for peptides (0 Glu, 1Glu and 2 Glu) from 16-h cultures of TcIL R49A, (insets) isotopic details of the major ion peak (\*) in each. Obs. values refer to the average mass obtained from deconvoluting the envelope of isotopic peaks. Calc. values refer to the average mass of the 0, 1 and 2 Glu peptides containing a C-terminal ketone. (F) ESI-MS data for peptides from 8-h cultures of TcIL R49A, (insets) isotopic details of the major ion peak (\*) in each. Comparison of insets in (E) and (F) shows the shift from lower  $m/z$  at 8 h to higher  $m/z$  at 16 h for the most abundant isotope (insets, \*) that arise from the slow, perhaps nonspecific, reduction of the C-terminal ketone to the alcohol.

**A**

|      |     |    |   |   |   |   |   |   |   |   |   |   |   |   |   |   |   |   |   |   |   |   |   |   |   |   |   |   |   |   |   |   |   |   |   |   |   |   |   |   |   |   |   |   |   |   |    |   |     |     |     |     |
|------|-----|----|---|---|---|---|---|---|---|---|---|---|---|---|---|---|---|---|---|---|---|---|---|---|---|---|---|---|---|---|---|---|---|---|---|---|---|---|---|---|---|---|---|---|---|---|----|---|-----|-----|-----|-----|
| TcIL | 1   | MN | W | T | S | L | H | I | F | Y | F | D | N | - | N | K | E | L | V | K | C | I | Y | N | M | - | - | L | N | N | F | F | D | K | F | F | Y | I | N | Y | W | D | G | G | P | H | 45 |   |     |     |     |     |
| 4WD9 | 735 | NE | W | L | Y | L | K | L | Y | I | S | I | N | R | Q | N | E | F | L | L | S | Y | L | P | D | I | Q | K | I | V | A | N | L | G | G | N | L | F | F | L | R | Y | T | D | P | K | P  | H | 782 |     |     |     |
|      |     |    | * | * |   |   |   |   |   |   |   |   |   |   |   |   |   |   |   |   |   |   |   |   |   |   |   |   |   |   |   |   |   |   |   |   |   |   |   |   |   |   |   |   |   |   |    |   |     |     |     |     |
| TcIL | 46  | I  | R | L | R | I | A | N | I | T | K | N | E | K | E | I | I | K | T | I | Q | K | F | I | Q | E | N | P | S | L | S | K | I | S | E | K | D | Y | L | I | T | S | N | N | F | A | D  | K | 93  |     |     |     |
| 4WD9 | 783 | I  | R | L | R | I | K | C | S | - | - | - | - | - | - | - | - | - | - | - | - | - | - | - | - | - | - | - | - | - | - | - | - | - | - | - | - | - | - | - | - | - | - | - | - | - | -  | - | -   | -   | 809 |     |
| TcIL | 94  | E  | N | S | E | I | L | E | L | Q | K | N | N | T | I | L | E | I | E | Y | K | P | E | I | D | K | Y | L | N | N | E | G | V | H | I | S | E | D | I | F | F | I | S | S | L | N | S  | L | T   | 141 |     |     |
| 4WD9 | 810 | -  | - | - | - | - | - | - | - | - | - | - | - | - | - | - | - | - | - | - | - | - | - | - | - | - | - | - | - | - | - | - | - | - | - | - | - | - | - | - | - | - | - | - | - | - | -  | - | -   | -   | -   | 149 |
| TcIL | 142 | Y  | L | K | N | S | P | N | - | - | - | - | - | - | - | - | - | - | - | - | - | - | - | - | - | - | - | - | - | - | - | - | - | - | - | - | - | - | - | - | - | - | - | - | - | - | -  | - | -   | 184 |     |     |
| 4WD9 | 850 | L  | L | T | L | I | K | D | T | N | N | D | W | K | V | D | D | V | S | I | L | V | N | Y | L | Y | L | K | C | F | F | Q | N | D | N | K | K | I | L | N | F | L | N | L | V | S | T  | K | K   | 897 |     |     |
| TcIL | 185 | H  | S | F | S | N | S | D | I | K | S | T | K | L | I | - | R | I | P | H | K | - | - | - | - | - | - | - | - | - | - | - | - | - | - | - | - | - | - | - | - | - | - | - | - | - | -  | - | -   | 218 |     |     |
| 4WD9 | 898 | V  | K | - | - | - | - | - | - | - | - | - | - | - | - | - | - | - | - | - | - | - | - | - | - | - | - | - | - | - | - | - | - | - | - | - | - | - | - | - | - | - | - | - | - | - | -  | - | -   | -   | 937 |     |
| TcIL | 219 | -  | - | - | - | - | - | - | - | - | - | - | - | - | - | - | - | - | - | - | - | - | - | - | - | - | - | - | - | - | - | - | - | - | - | - | - | - | - | - | - | - | - | - | - | - | -  | - | -   | 256 |     |     |
| 4WD9 | 938 | L  | F | L | K | M | I | A | Q | D | F | E | L | Q | K | V | Y | S | I | D | S | I | I | H | V | H | N | N | R | L | I | C | I | K | P | F | E | E | A | I | L | S | S | I | L | T | K  | F | 985 |     |     |     |
| TcIL | 257 | W  | G | D | E | Y | E | N | K | S | N | K |   |   |   |   |   |   |   |   |   |   |   |   |   |   |   |   |   |   |   |   |   |   |   |   |   |   |   |   |   |   |   |   |   |   |    |   |     | 267 |     |     |
| 4WD9 | 986 | F  | V | S | E | E | Y | M | K | - | - | - |   |   |   |   |   |   |   |   |   |   |   |   |   |   |   |   |   |   |   |   |   |   |   |   |   |   |   |   |   |   |   |   |   |   |    |   | 993 |     |     |     |

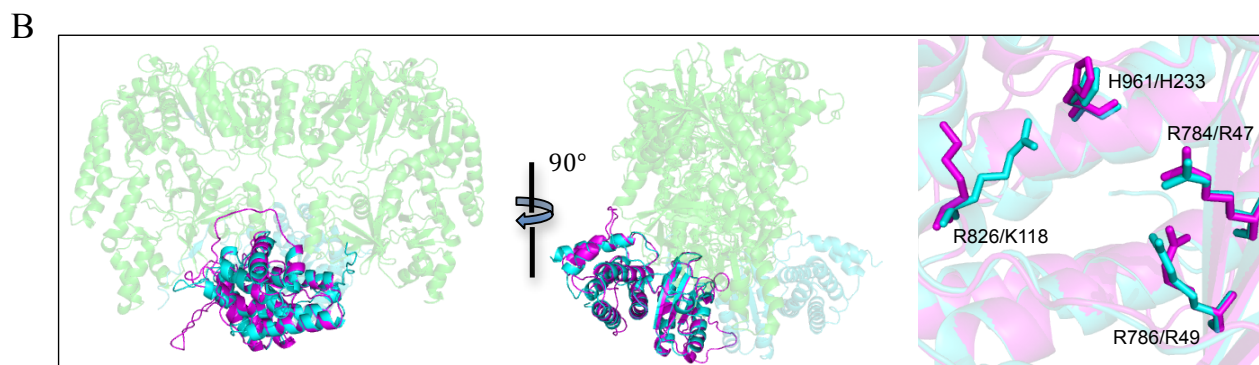



C

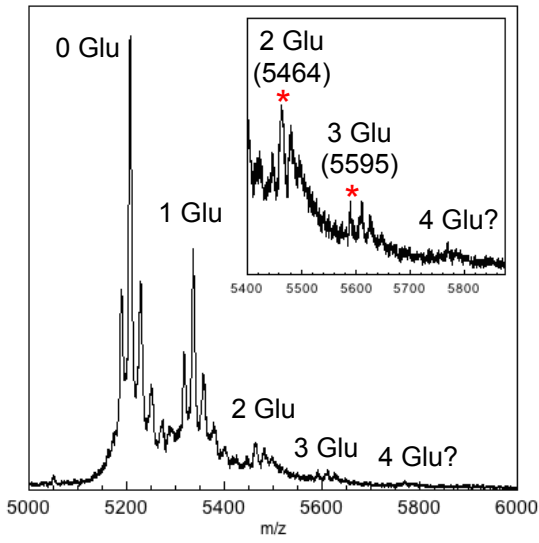

D

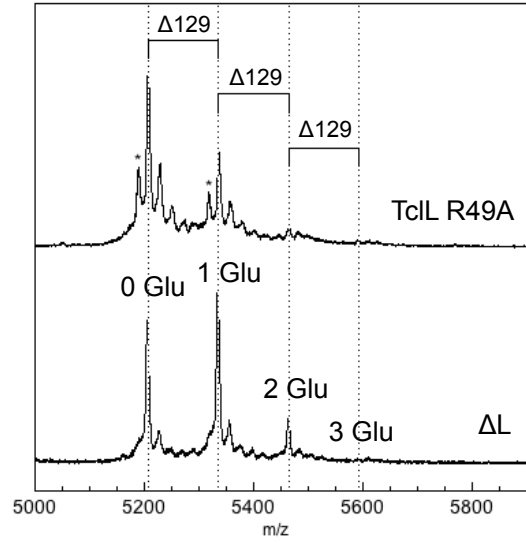

E

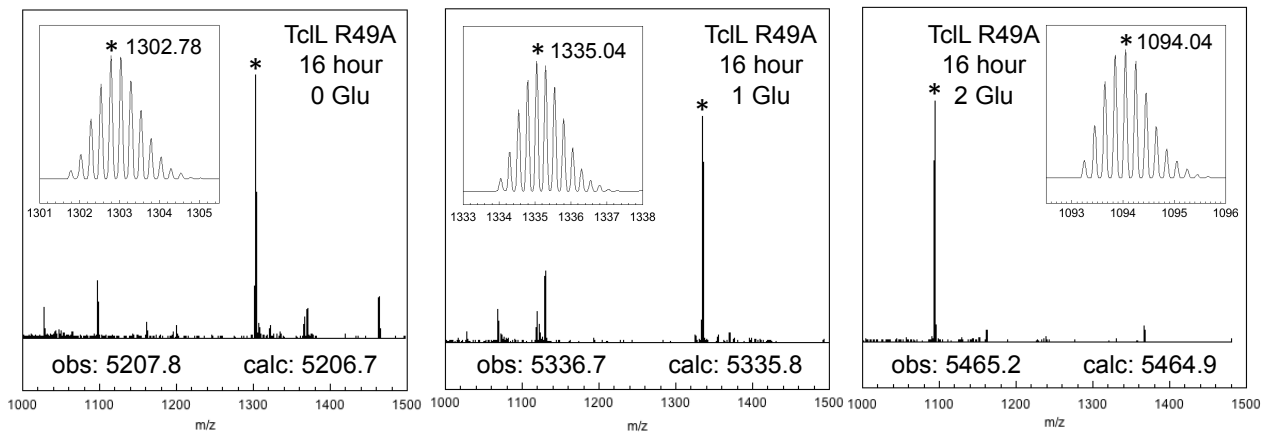

F

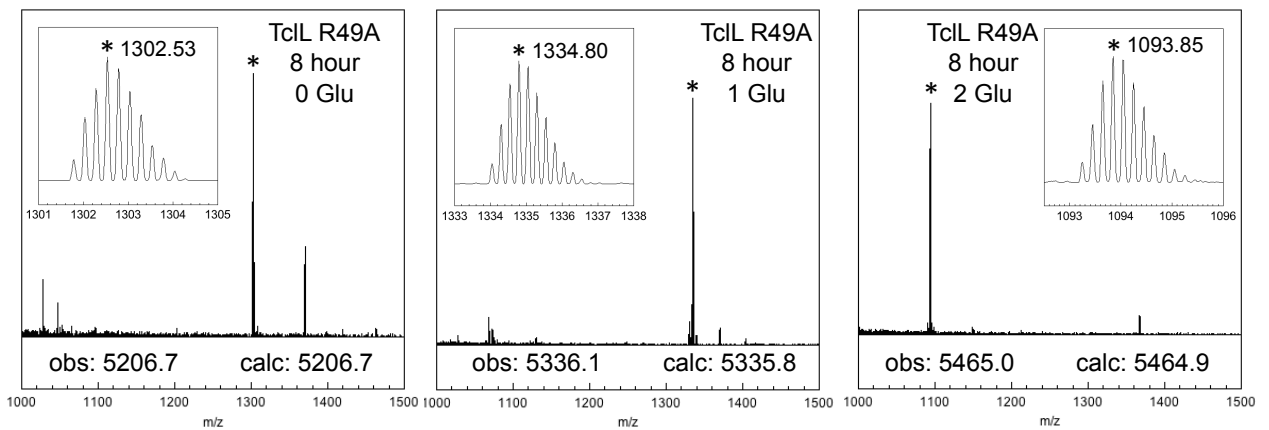

**Fig. S6. TcIN structural modeling and MALDI-MS data for modified TcIE from the TcIN-defective strain treated with formic acid or glutathione.** (A) HHpred alignment of TcIN with a putative nitroreductase from *Anabaena variabilis* ATCC 29413 (ava\_2154, PDB: 3EO7, probability >99%). (B, left) Overlay of TcIN model (Modeller, magenta) with structure of the single-FMN-containing putative nitroreductase (PDB: 3EO7, cyan). FMN is shown in green. (B, right) Close-up showing FMN binding site and key phosphate-binding residues in 3EO7 structure. An R269A/S271A (\* in A) double mutant of the corresponding residues in TcIN was made to disrupt FMN binding in order to inactivate the enzyme. (C) Comparison of MALDI-MS data for TcIN R269A/S271A peptide from 16-h culture before (top) and after (bottom) incubation with 10% formic acid (>24 h) to rehydrate/ring-open the thiazolines. Incomplete conversion of peptide to a single peak with 0 dehydrations suggests small amounts of thiazole and Dha/Dhb are introduced over the longer culture time. (D) MALDI-MS data for TcIN R269A/S271A peptide also show peaks consistent with glutathione (GSH ~Δ307) additions, suggesting small amounts of Dha/Dhb modifications are present in the sample (lower *m/z* set is from NN peptide cleavage) (12).

A

|             |     |   |   |   |   |   |   |   |   |   |   |   |   |   |   |   |   |   |   |   |   |   |   |   |   |   |   |   |   |   |   |   |   |   |   |   |   |   |   |   |   |   |   |   |   |   |   |   |     |     |     |    |
|-------------|-----|---|---|---|---|---|---|---|---|---|---|---|---|---|---|---|---|---|---|---|---|---|---|---|---|---|---|---|---|---|---|---|---|---|---|---|---|---|---|---|---|---|---|---|---|---|---|---|-----|-----|-----|----|
| <i>TcIN</i> | 3   | I | S | K | F | L | Y | N | L | H | Y | N | P | G | E | V | V | S | A | S | Y | T | I | E | D | T | I | Q | R | N | S | E | G | F | Y | K | G | Y | G | I | D | F | L | - | K | L | Q | K | 49  |     |     |    |
| <i>3EO7</i> | 10  | A | Q | H | Y | H | E | R | T | K | Y | D | P | E | T | I | A | S | K | S | Q | R | L | D | W | A | K | Q | P | V | P | F | K | E | Y | K | I | G | S | A | I | D | L | K | P | Y | L | Q | -   | 56  |     |    |
| <i>TcIN</i> | 50  | S | P | I | V | K | V | I | - | - | - | - | - | - | - | - | - | - | - | - | L | K | S | Y | G | D | I | F | F | N | - | - | R | V | E | N | K | K | - | - | P | L | I | F | C | R | K | M | T   | P   | S   | 84 |
| <i>3EO7</i> | 57  | - | - | E | T | P | E | V | F | V | N | D | T | N | G | Q | W | W | Q | R | L | S | R | L | L | F | R | S | Y | G | L | T | A | R | M | P | S | M | G | N | T | V | Y | L | R | A | A | P | S   | 102 |     |    |
| <i>TcIN</i> | 85  | G | G | G | L | Y | P | I | N | I | F | I | C | T | N | F | - | K | N | - | R | I | A | L | F | Q | F | D | F | K | R | N | L | L | - | - | - | - | - | - | - | - | - | - | - | - | - | - | 116 |     |     |    |
| <i>3EO7</i> | 103 | A | G | G | L | Y | P | A | E | V | Y | V | V | S | R | G | T | P | L | L | S | P | G | L | L | Y | N | Y | Q | C | R | T | H | S | L | I | H | Y | W | E | S | D | V | W | Q | S | L | Q | E   | A   | 150 |    |
| <i>TcIN</i> | 117 | - | - | F | I | K | Y | I | N | I | E | I | N | N | E | C | T | - | L | Y | L | V | P | C | Y | T | R | N | Y | F | K | Y | K | E | F | S | Y | R | L | C | P | L | D | T | G | Y | L | I | 161 |     |     |    |
| <i>3EO7</i> | 151 | C | F | W | H | P | A | L | E | S | - | - | - | - | - | - | - | - | - | - | - | - | - | - | - | - | - | - | - | - | - | - | - | - | - | - | - | - | - | - | - | - | - | - | - | - | - | - | -   | 193 |     |    |
| <i>TcIN</i> | 162 | S | T | L | L | Y | N | F | S | V | E | N | I | T | F | K | L | S | I | K | L | N | K | N | S | D | I | T | D | V | L | N | E | I | G | C | E | E | I | P | Y | S | I | I | E | L | N | E | -   | 208 |     |    |
| <i>3EO7</i> | 194 | G | N | I | E | L | S | A | A | I | T | D | Y | R | P | H | L | I | G | G | F | I | D | - | E | A | V | N | D | L | L | Y | I | D | P | L | Q | E | G | A | I | A | V | L | P | L | A | D | L   | 240 |     |    |
| <i>TcIN</i> | 241 | L | D | I | Q | Q | N | I | S | P | G | C | T | A | L | P | S | A | T | E | T | N | Y | P | Q | V | P | D | G | E | L | L | K | Y | F | H | H | T | Q | I | S | A | S | I | T | G | K | L | 288 |     |     |    |
| <i>TcIN</i> | 209 | - | - | - | - | - | - | - | - | - | - | - | - | - | - | - | - | - | - | - | - | - | - | - | - | - | - | - | - | - | - | - | - | - | - | - | - | - | - | - | - | - | - | - | - | - | - | - | -   | 246 |     |    |
| <i>3EO7</i> | 289 | N | L | P | T | V | I | Q | E | K | S | L | E | D | K | Y | N | F | P | F | C | L | K | I | S | T | V | S | - | A | P | I | Y | W | G | E | N | L | S | D | L | E | I | T | M | H | K | - | -   | 333 |     |    |
| <i>TcIN</i> | 247 | H | K | D | I | N | I | N | F | N | E | N | K | L | F | E | K | F | E | I | Q | K | R | I | S | P | G | G | E | F | I | Q | N | S | K | V | E | Q | E | S | I | N | K | F | I | S | L | I | 294 |     |     |    |
| <i>3EO7</i> | 334 | - | - | - | - | - | - | - | - | - | - | - | - | - | - | - | - | - | - | - | - | - | - | - | - | - | - | - | - | - | - | - | - | - | - | - | - | - | - | - | - | - | - | - | - | - | - | - | -   | 357 |     |    |
| <i>TcIN</i> | 295 | M | Q | Y | K | N | K | - | - | - | - | - | - | - | - | - | - | - | - | - | - | - | - | - | - | - | - | - | - | - | - | - | - | - | - | - | - | - | - | - | - | - | - | - | - | - | - | - | 327 |     |     |    |
| <i>3EO7</i> | 358 | Y | Q | P | Q | N | Y | I | D | Q | S | L | D | N | S | P | D | Y | F | D | L | N | L | I | E | T | F | I | A | V | C | G | V | Q | G | L | E | A | G | C | Y | Y | A | P | K | A | Q | E | 405 |     |     |    |
| <i>TcIN</i> | 328 | F | L | S | Y | K | N | N | V | S | I | E | F | I | D | K | Q | L | T | R | R | N | F | N | L | L | A | V | P | Y | I | L | Y | V | G | V | N | E | E | K | I | K | E | N | Y | S | N | N | Y   | 375 |     |    |
| <i>3EO7</i> | 406 | L | R | Q | I | R | F | K | N | F | R | R | E | L | - | H | F | L | C | L | G | Q | E | L | G | R | D | A | A | A | V | I | F | H | T | S | D | L | K | S | A | I | A | Q | Y | G | D | R | V   | 452 |     |    |
| <i>TcIN</i> | 376 | F | K | I | S | R | I | I | A | G | F | W | S | G | V | V | S | I | L | S | A | Q | C | G | L | S | T | H | P | M | S | Y | N | A | R | E | L | E | E | Y | I | F | - | K | N | R | Y | S | 422 |     |     |    |
| <i>3EO7</i> | 453 | Y | R | Y | L | H | M | D | A | G | H | L | G | Q | R | L | N | L | A | A | I | Q | L | N | L | G | V | S | G | I | G | G | F | F | D | D | Q | V | N | E | V | L | G | I | P | N | D | E | A   | 500 |     |    |
| <i>TcIN</i> | 423 | I | L | N | Q | I | V | I | G |   |   |   |   |   |   |   |   |   |   |   |   |   |   |   |   |   |   |   |   |   |   |   |   |   |   |   |   |   |   |   |   |   |   |   |   |   |   |   |     | 430 |     |    |
| <i>3EO7</i> | 501 | V | I | Y | I | T | T | L | G |   |   |   |   |   |   |   |   |   |   |   |   |   |   |   |   |   |   |   |   |   |   |   |   |   |   |   |   |   |   |   |   |   |   |   |   |   |   |   |     |     | 508 |    |

B

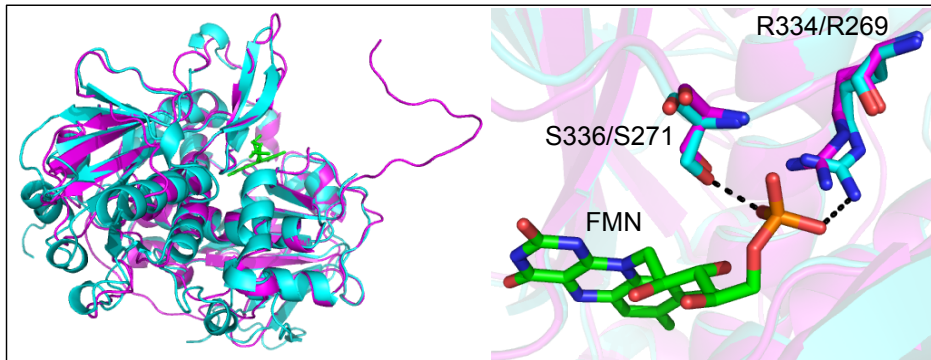

C

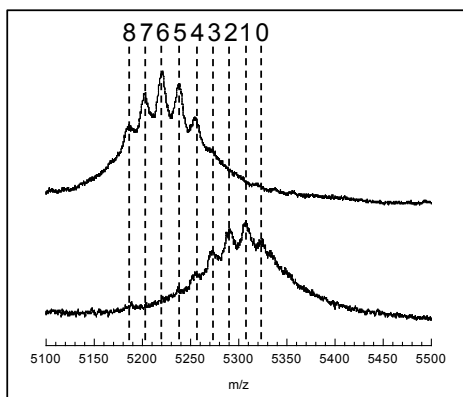

D

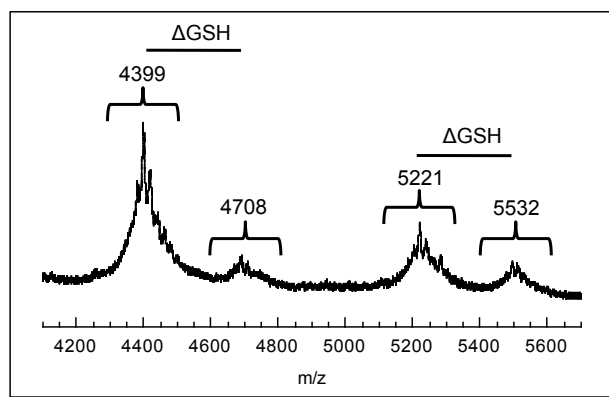

**Fig. S7. TcIP structural modeling, mutant bioassays, and expanded mass spectrometry data for modified TcIE from the TcIP-defective strains.** (A) TcIP is annotated as a short-chain dehydrogenase. It was aligned with (*R*)-hydroxypropyl-coenzyme M dehydrogenase (PDB: 2CFC) using HHpred (probability >99%). Three conserved active site residues shown to abolish activity in other short-chain dehydrogenases (13) were chosen for mutation: Asn97(\*), S126(\*) and Y139(\*). (B) The methanol extract from TcIP N97L showed no detectable bioactivity, however, extracts from TcIP S126A and TcIP Y139F retained activity. Extracts from cells expressing GST-TcIE only or the full wild type pathway + GST-TcIE are shown as negative and positive controls for bioactivity. (C) (*left*) Overlay of TcIP model (magenta) (Modeller) with tetrameric (*R*)-hydroxypropyl-coenzyme M dehydrogenase (2CFC, cyan), NAD<sup>+</sup> is shown as green sticks. (*middle*) Close-up showing four conserved residues important for catalysis in other short-chain dehydrogenases (13-15). (*right*) Alternative orientation of active site, showing H-bonds from side chain of Asn114 (Asn97 in TcIP) to backbone of Ile90 in 2CFC. (D) ESI mass spectrum of TEV-cleaved purified GST-peptide from TcIP N97L mutant; major peak has *m/z* expected for peptide with an intact threonine at the C-terminus (i.e., no decarboxylation). Since no C-terminal processing has occurred, the isotopic pattern (*inset*) is consistent with a single product rather than a mix of alcohol and ketone as found for intermediates that have undergone decarboxylation. (E) MALDI-MS data for PP from ΔTcIP (*top*) and TcIP N97L (*bottom*) both show no oxidative decarboxylation activity as the major product is consistent with a peptide containing 6 thiazoles. Peaks consistent with minor amounts of 1-2 Ser/Thr dehydration are present (\*) along with peaks for subsequent glutathione additions (#).

**A**

|             |     |    |   |   |   |   |      |   |   |   |   |   |   |   |   |   |   |   |   |   |   |   |   |   |   |   |   |   |   |   |   |   |   |   |   |   |   |   |   |   |   |   |   |   |    |   |   |   |     |     |
|-------------|-----|----|---|---|---|---|------|---|---|---|---|---|---|---|---|---|---|---|---|---|---|---|---|---|---|---|---|---|---|---|---|---|---|---|---|---|---|---|---|---|---|---|---|---|----|---|---|---|-----|-----|
| <i>TcIP</i> | 1   | MN | I | L | I | V | GASS | E | I | A | H | Y | I | I | N | Y | H | K | - | I | K | D | Q | V | F | L | L | D | L | P | S | Q | I | D | - | - | - | - | - | N | - | L | K | - | 39 |   |   |   |     |     |
| <i>2CFC</i> | 3   | R  | V | A | I | V | GASS | G | N | G | L | A | I | A | T | R | F | L | A | R | G | D | R | V | A | A | L | D | L | S | A | E | T | L | E | E | T | A | R | T | H | W | H | A | 49 |   |   |   |     |     |
| <i>TcIP</i> | 40  | K  | W | D | - | - | -    | - | T | N | F | D | T | L | D | V | Q | N | N | K | E | I | E | T | Y | F | K | E | C | N | I | T | F | D | K | L | Y | Y | L | V | G | I | N | T | M  | - | - | - | 79  |     |
| <i>2CFC</i> | 50  | Y  | A | D | K | V | L    | R | V | R | A | D | V | A | D | E | G | D | V | N | A | A | I | A | A | T | M | E | Q | F | G | A | I | D | V | L | V | N | N | A | G | I | T | G | N  | S | E | A | 96  |     |
| <i>TcIP</i> | 80  | K  | N | G | L | D | F    | N | S | Q | E | W | D | N | I | M | G | T | N | L | K | S | F | Y | F | F | V | K | E | F | T | K | K | N | V | I | N | N | I | - | - | P | A | T | I  | V | S | I | 124 |     |
| <i>2CFC</i> | 97  | G  | V | L | H | T | T    | P | V | E | Q | F | D | K | V | M | A | V | N | V | R | G | I | F | L | G | C | R | A | V | L | P | H | - | - | - | M | L | L | Q | G | A | G | V | I  | V | N | I | 140 |     |
| <i>TcIP</i> | 125 | A  | S | Q | H | G | V    | V | A | N | A | Y | R | T | P | Y | C | V | S | K | A | G | L | I | H | L | T | R | V | L | A | L | E | L | S | L | Y | D | I | R | V | N | C | V | S  | P | G | F | 171 |     |
| <i>2CFC</i> | 141 | A  | S | V | A | S | L    | V | A | F | P | G | R | S | A | Y | T | T | S | K | G | A | V | L | Q | L | T | K | S | V | A | V | D | Y | A | G | S | G | I | R | C | N | A | V | C  | P | G | M | 187 |     |
| <i>TcIP</i> | 172 | I  | L | N | S | K | S    | H | E | F | L | N | N | P | K | V | K | K | E | Y | L | S | K | T | P | L | Q | R | Y | I | T | P | N | E | V | A | N | C | C | I | F | L | - | - | N  | N | S | T | 216 |     |
| <i>2CFC</i> | 188 | I  | E | T | P | M | T    | Q | W | R | L | D | Q | P | E | L | R | D | Q | V | L | A | R | I | P | Q | K | E | I | G | T | A | A | Q | V | A | D | A | V | M | F | L | A | G | E  | D | A | T | 234 |     |
| <i>TcIP</i> | 217 | S  | I | T | C | Q | N    | L | I | I | D | C | G | Y | T | I | W |   |   |   |   |   |   |   |   |   |   |   |   |   |   |   |   |   |   |   |   |   |   |   |   |   |   |   |    |   |   |   | 232 |     |
| <i>2CFC</i> | 235 | Y  | V | N | G | A | A    | L | V | M | D | C | A | Y | T | A | I |   |   |   |   |   |   |   |   |   |   |   |   |   |   |   |   |   |   |   |   |   |   |   |   |   |   |   |    |   |   |   |     | 250 |

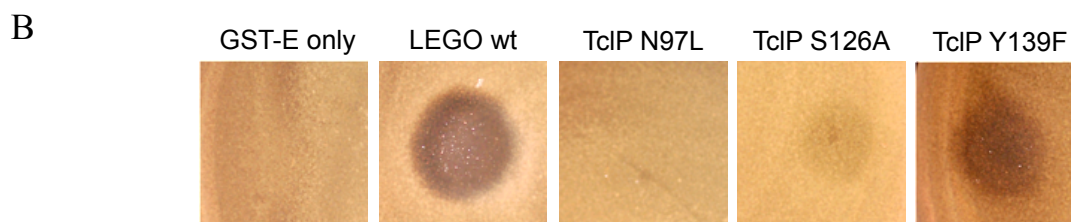

C

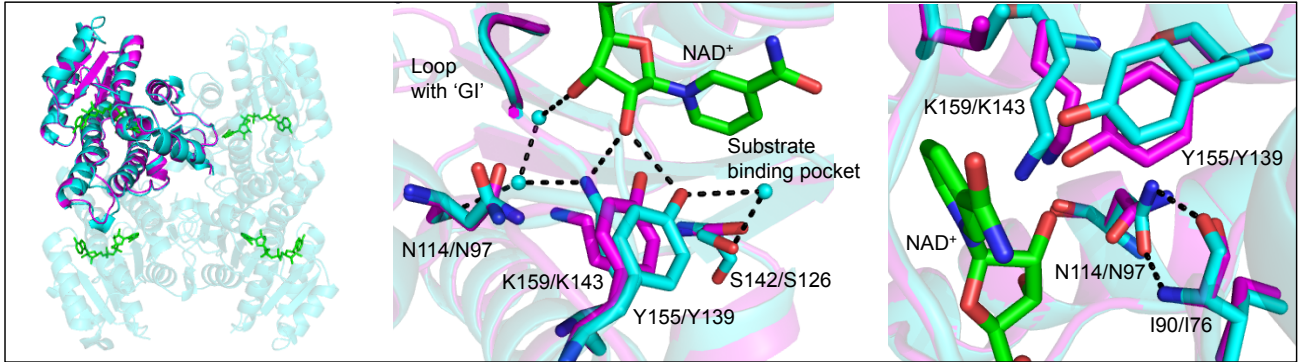

D

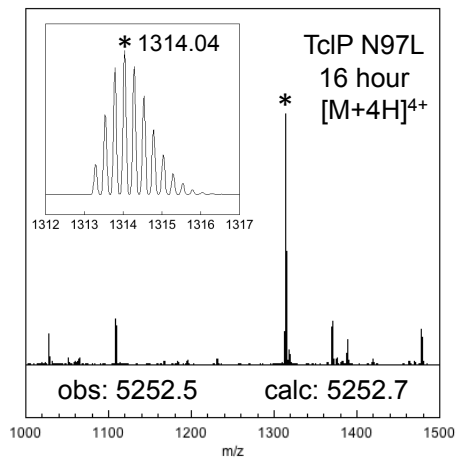

E

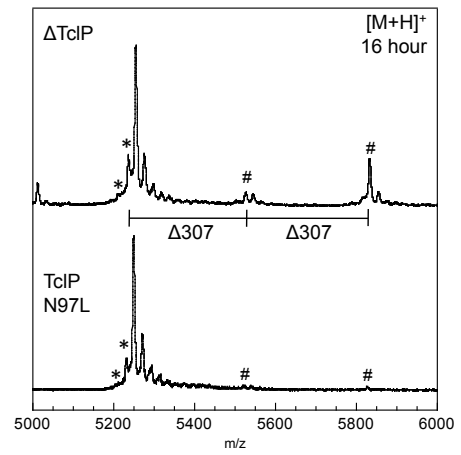

**Fig. S8. TcIM alignments, mutant bioactivity assays, and mass spectrometry data for modified TcIE from TcIM-deletion strains.** Currently no homologous crystal structures are available for structure modeling of TcIM. (A) Clustal Omega sequence alignment of several TcIM homologs from different thiopeptide clusters including McTcIM: GenBank AIU53948.1, BcTcIM: GenBank AAP11951.1, TbtD: GenBank ADG87279.1, LazC: GenBank BAO57436.1, BerD: GenBank AGN11669.1, NocO: GenBank ADR01090.1, NosO: GenBank ACR48344.1, GetF: GenBank AEM00619.1. Blue highlighting indicates sequence conservation (light = low, dark = high). Red (\*) indicate amino acids that are the most important for catalytic activity in TbtD (16). (B) Bioassays of methanol extracts indicate mutations of two conserved residues, Y222A and R235A, in TcIM did not abolish activity. Extracts from cells expressing GST-TcIE only or the full wild type pathway + GST-TcIE are shown as negative and positive controls for bioactivity. (C) Expanded window of ESI mass spectrometry data for TEV-cleaved peptides isolated from  $\Delta$ TcIM and  $\Delta$ TcIM $\Delta$ TcIS deletion mutants (same data as Fig. 4). (D) (Left) MALDI-MS data for TEV-cleaved peptide from a 16-h culture of  $\Delta$ TcIM mutant strain. The long culture resulted in cleavage of the (presumably processed) core peptide leaving just the leader peptide (GGSEFQTNNIEGLDVTDLDFISEEVTEKDEKEIMGA, expected  $m/z$  3976 after TEV cleavage) attached to the GST-tag. (Right & table) MALDI-MS data for TEV-cleaved peptide obtained from an 8-h culture of the  $\Delta$ TcIM mutant strain that was eluted from the affinity resin with 10 mM reduced glutathione prior to TEV-cleavage. Peaks d-g are consistent with full length modified precursor with 0-3 additions of glutathione ( $\Delta$ 307  $m/z$ ) to the Dha/Dhb residues. Peaks a-c (\*) are consistent with 1-3 GSH addition products of the NN cleavage product described in Fig. S4.

A

|        |       |                                                                      |     |
|--------|-------|----------------------------------------------------------------------|-----|
| McTcIM | ----- |                                                                      |     |
| BcTcIM | ----- |                                                                      |     |
| TbtD   | 1     | -----MAAGERWWRFRVDYHAGPMDDL I LDGVRF AFAAFAAQ-----                   | 37  |
| LazC   | 1     | -----MSDPAD-----GRGAVTAWDVVLYHYRDPDKARAL-REAVLPLARQAAAE-----         | 43  |
| BerD   | 1     | MSYGRQLQDHV TAR LAPAE I SGVSFVHLFA-TIQPVGSKYNDTFAPL I RELFAPERVGGAGG | 61  |
| NocO   | 1     | -----MTWTEL VFPATQDEQPLVAGVLA PL LADLDR-----                         | 32  |
| NosO   | 1     | MTSGPGQAPAE---AAHAAGAAWLE IGLDAPADAVPALVAGVVRPL LREPAEPG---A-E       | 53  |
| GetF   |       | -----                                                                |     |
| McTcIM | 1     | -----MKTQVIN-----                                                    | 7   |
| BcTcIM | 1     | -----MEQYHKI VLTGSNAE--TML I KNIEPVAVKFINNYK-----GFFY                | 38  |
| TbtD   | 38    | APMAYFLRHWRRGPHLR IYVSTTREAL EAVRPA I EHVGGYLRARPS PGM---ADPSAFLP    | 96  |
| LazC   | 44    | GLAAHVE RHWRFGPHLR LRLRGPEARVAGAAQRAAEALRA-WA--AAHPSV---ADRSDEQL     | 99  |
| BerD   | 62    | HGYYYFVRTQDAQLGTDTL-----QISIEGVSD---EDSTRADLHRTA ERYGCAA             | 108 |
| NocO   | 33    | --PGLFLRELGP EGATRLLL-----QVRDAP-PDL---P-----                        | 60  |
| NosO   | 54    | PVPGFFLRGVGAAQPALV-V-----QLEVTPTGTDL---AEPYAA--                      | 88  |
| GetF   | 1     | -----M---ADRA-----                                                   | 5   |
| McTcIM | 8     | -----DFLLLSNHS-----NDNSF-YFLENDKLEIFNINNSDLKKTKS--FMCD----K          | 49  |
| BcTcIM | 39    | VFK--YSKDFPIIDVYINNKI VTE NQLNKILQNSGAKYKIYKNSIFNETQG--NFCM----L     | 92  |
| TbtD   | 97    | LHER-L-AELEGEDGP LMPWSPD-NTI-----HA-EGE-----PEPLTV                   | 132 |
| LazC   | 100   | LA EAAVAGRAELIAPPYAPLVPD-NTV-----VAAPADRS AEDALRALI CAESAEL          | 149 |
| BerD   | 109   | Q----V-DATPLDSVPSPLW-----NAGFT-----GTCFSASS-                         | 136 |
| NocO   | 61    | -----T--RTAALPVQPTAVRAATV-----APLGGPVFD-----GPG LDETT-               | 95  |
| NosO   | 89    | RA RA-L-A--AGLGLPVQVA-AGRATL-----VPLAGSVFA-----GAALGPVT-             | 127 |
| GetF   | 6     | -----GV-ELRQDWLAD-NSL-----TW-TTGALA-----ATGTAETTL                    | 36  |
| McTcIM | 50    | SDEYLSIY-LNKLNDFYE---NMMYLQVN-----NYSVFQTELFKFMI-----NYS             | 91  |
| BcTcIM | 93    | GDKYLAEF-FKKTNEISL---NILNQNF-----SYNKKIEFALEIML-----ISA              | 134 |
| TbtD   | 133   | RDVLLADF-YADTTPSVY---HALERVR-----SGASLPTIAFDLVVATA-----H             | 174 |
| LazC   | 150   | REEL-----LRTGLPALDSACHFLGAHGDT-----PQARVQLVVTA LAH-----A             | 190 |
| BerD   | 137   | -KRL-----FQEAAPTLV---SFLNRAAE TPQSPPPALGAIRLMAAHTRATLLRSPQREIDG      | 189 |
| NocO   | 96    | -RGF-----LADTAPVAV---DLST-----RPDR TGAALT LMTAHAAVADPA-----          | 134 |
| NosO   | 128   | -RAA-----LAAVCPALL---TATEAAEQG--RPALLASAAELMSAHLRAVSVSAA PGPRQW      | 178 |
| GetF   | 37    | -QSLLDFHYAATVPALR-----LLSAA-----PGERLGLACADLMAVTA-----Q              | 76  |





D

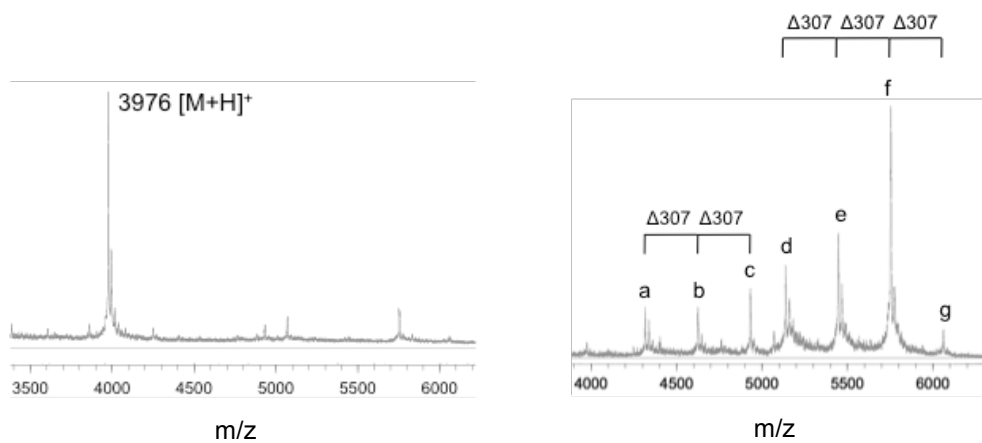

| peak | $[M+H]^+$ | # of GSH adducts |
|------|-----------|------------------|
| a    | 4319*     | 1                |
| b    | 4626*     | 2                |
| c    | 4932*     | 3                |
| d    | 5138      | 0                |
| e    | 5447      | 1                |
| f    | 5754      | 2                |
| g    | 6062      | 3                |

**Table S1. Plasmids used to generate *tcl* mutant strains.**

| Plasmid | Genotype <sup>a</sup>         | Description <sup>b</sup>                                                                                                                                                                                |
|---------|-------------------------------|---------------------------------------------------------------------------------------------------------------------------------------------------------------------------------------------------------|
| pLEGO   | P <sub>xyI</sub> -TcIIJKLMNPS | Parental plasmid containing all MP1 processing genes. Used as template DNA for generating all mutant constructs.                                                                                        |
| L7152D7 | TcIJ E319A                    | TcIJ E319A was amplified from pLEGO by OE-PCR using oPB465 as external forward primer, oPB471 as internal reverse primer, oPB470 as internal forward primer and oPB474 as external reverse primer       |
| L7153C5 | TcIK R181A                    | TcIK R181A was amplified from pLEGO by OE-PCR using oPB475 as external forward primer, oPB478 as internal reverse primer, oPB477 as internal forward primer and oPB476 as external reverse primer       |
| L7154C1 | TcIL R49A                     | TcIL R49A was amplified from pLEGO by OE-PCR using oPB447 as external forward primer, oPB485 as internal reverse primer, oPB484 as internal forward primer and oPB483 as external reverse primer        |
| L769A1  | TcIM Y222A                    | TcIM Y222A was amplified from pLEGO by OE-PCR using oPB500 as external forward primer, oPB534 as internal reverse primer, oPB533 as internal forward primer and oPB011 as external reverse primer       |
| L769B1  | TcIM R235A                    | TcIM R235A was amplified from pLEGO by OE-PCR using oPB500 as external forward primer, oPB536 as internal reverse primer, oPB535 as internal forward primer and oPB011 as external reverse primer       |
| L769C1  | TcIP N97L                     | TcIP N97L was amplified by from pLEGO OE-PCR using oPB507 as external forward primer, oPB538 as internal reverse primer, oPB537 as internal forward primer and oPB506 as external reverse primer        |
| L769D1  | TcIP S126A                    | TcIP S126A was amplified from pLEGO by OE-PCR using oPB507 as external forward primer, oPB540 as internal reverse primer, oPB539 as internal forward primer and oPB506 as external reverse primer       |
| L769E1  | TcIP Y139F                    | TcIP Y139F was amplified from pLEGO by OE-PCR using oPB507 as external forward primer, oPB542 as internal reverse primer, oPB541 as internal forward primer and oPB506 as external reverse primer       |
| L783A1  | TcIN<br>R269A/S271A           | TcIN R269A/S271A was amplified from pLEGO by OE-PCR using oPB448 as external forward primer, oPB549 as internal reverse primer, oPB550 as internal forward primer and oPB503 as external reverse primer |
| L762A1  | ΔTcIM                         | pLEGOΔTcIM was constructed by treating pLEGO with SacI/Sall/Klenow and religating plasmid                                                                                                               |
| L762D1  | ΔTcIS                         | pLEGOΔTcIS was constructed by treating pLEGO with XhoI/BglII/Klenow and religating plasmid                                                                                                              |
| L783G2  | ΔTcIL                         | pLEGOΔTcIL was constructed by treating pLEGO with PstI/SacI/Klenow and religating plasmid                                                                                                               |
| L794C2  | ΔTcIM,ΔTcIS                   | pLEGOΔTcIMS was constructed by treating pLEGOΔTcIM (L762A1) with XhoI/BglII/Klenow and religated                                                                                                        |

<sup>a</sup> Genotypes represent variations in pLEGO, which integrate into the *amyE* locus of *B. subtilis*; <sup>b</sup> Full primer sequences are provided in Table S2. OE-PCR: overlap extension polymerase chain reaction.

**Table S2. Primers used in this study.**

| <b>Primer</b> | <b>Sequence (5'-3')</b>                         |
|---------------|-------------------------------------------------|
| oPB281        | CCGCCTTGAAAATACAGGTTTTCTCCTCCTTTTTGGAGGATGGTCGC |
| oPB282        | CCTGTATTTTCAAGGCGGATCAGAATCCAAACAAACAAT         |
| oPB288        | GCGTCTAGAAAGGaGGtgGAGGTCATGTCCCCTATACTAGGTTA    |
| oPB289        | CGCGGATCCTTAAGTTGTACAACAACCTGCA                 |
| oPB011        | GCTGACACAACCTTCTCCTGG                           |
| oPB447        | GTGAATCCTCGTCTTAATGATTCA                        |
| oPB448        | CTCTATCCAATTTTACATCTAAAAATCC                    |
| oPB465        | CAAGTTTAATGTCCAAACTTTTTGAAGGTG                  |
| oPB470        | GTATATTATGGCCTAATGGCAGTTATCGAGAGAGACTCTT        |
| oPB471        | AAGAGTCTCTCTCGATAACTGCCATTAGGCCATAATATAC        |
| oPB474        | CTGTTACATTTACGCGTTATACTATAAGGC                  |
| oPB475        | GTACCTGGATTATTACCTATGACTTTTCGG                  |
| oPB476        | AAGATATGTAGGCTTGTCCAATTCA                       |
| oPB477        | CCATAAAAAATTACTACAATGCAATGAATTTAAAACCTTCTC      |
| oPB478        | GAGAAGGTTTTAAATTCATTGCATTGTAGTAATTTTTTATGG      |
| oPB483        | GATAAGTATTCGTCACCTTTTATCACCC                    |
| oPB484        | GGTCCCTCATATCCGTCTAGCAATAGCTAATATTACAAAGA       |
| oPB485        | TCTTTGTAATATTAGCTATTGCTAGACGGATATGAGGACC        |
| oPB500        | CGAACAATAGATTAGGAATCAAACC                       |
| oPB503        | CTATCTGAGAAGGAAGATCAAGTAG                       |
| oPB506        | GTAAAGCAATAGGACTTGTTCTCTCC                      |
| oPB507        | GGTCTATCTACCCACCCAATGATG                        |
| oPB533        | TTTCTTACAATAGCTCAAGCCTTTTTTATTA AAAACATGG       |
| oPB534        | CCATGTTTTTTAATAAAAAGGCTTGAGCTATTGTAAGAAA        |
| oPB535        | CATGGGAATAAGTAATATTAACGCATATTTCACTTGCTAT        |
| oPB536        | ATAGCAAGTGAAATATGCGTTAATATTACTTATTCCCATG        |
| oPB537        | GACAATATAATGGGGACTCTTCTCAAAGCTTTTATTTT          |
| oPB538        | GAAATAAAAGCTTTTGAGAAGAGTCCCCATTATATTGTC         |
| oPB539        | CCATAGTTAGTATTGCAGCTCAACATGGCGTC                |
| oPB540        | GACGCCATGTTGAGCTGCAATACTA ACTATGG               |
| oPB541        | CTAATGCCTATAGA ACTCCTTTTTGTGTAAGTAAAGCTGG       |
| oPB542        | CCAGCTTTACTTACACAAAAGGAGTTCTATAGGCATTAG         |
| oPB549        | AAATTCGCCACCCGGAGCTATTGCTTTTTGTATTTCGAAT        |
| oPB550        | ATTCGAAATACAAAAGCAATAGCTCCGGGTGGCGAATTT         |

## SI References

1. Bennallack PR, Burt SR, Heder MJ, Robison RA, & Griffiths JS (2014) Characterization of a novel plasmid-borne thiopeptide gene cluster in *Staphylococcus epidermidis* strain 115. *J Bacteriol* 196(24):4344-4350.
2. Waterhouse AM, Procter JB, Martin DMA, Clamp M, & Barton GJ (2009) Jalview Version 2—a multiple sequence alignment editor and analysis workbench. *Bioinformatics* 25(9):1189-1191.
3. Pettersen EF, *et al.* (2004) UCSF Chimera—A visualization system for exploratory research and analysis. *J Comput Chem* 25(13):1605-1612.
4. Sievers F, *et al.* (2011) Fast, scalable generation of high - quality protein multiple sequence alignments using Clustal Omega. *Mol Syst Biol* 7(1):article 539.
5. Zhang Z & Marshall AG (1998) A universal algorithm for fast and automated charge state deconvolution of electrospray mass-to-charge ratio spectra. *J Am Soc Mass Spectrom* 9(3):225-233.
6. Bennallack PR, *et al.* (2016) Reconstitution and minimization of a micrococcin biosynthetic pathway in *Bacillus subtilis*. *J Bacteriol* 198(18):2431-2438.
7. Koehnke J, *et al.* (2015) Structural analysis of leader peptide binding enables leader-free cyanobactin processing. *Nat Chem Biol* 11(8):558-563.
8. Dunbar KL, *et al.* (2014) Discovery of a new ATP-binding motif involved in peptidic azoline biosynthesis. *Nat Chem Biol* 10(10):823-829.
9. Garg N, Salazar-Ocampo LMA, & van der Donk WA (2013) In vitro activity of the nisin dehydratase NisB. *Proc Natl Acad Sci USA* 110(18):7258-7263.
10. Rawlings ND, Barrett AJ, & Bateman A (2011) Asparagine peptide lyases: a seventh catalytic type of proteolytic enzymes. *J Biol Chem* 286(44):38321-38328.
11. Ortega MA, *et al.* (2015) Structure and mechanism of the tRNA-dependent lantibiotic dehydratase NisB. *Nature* 517(7535):509-512.
12. Rose NL, *et al.* (2003) Involvement of dehydroalanine and dehydrobutyrine in the addition of glutathione to nisin. *J Agric Food Chem* 51(10):3174-3178.
13. Filling C, *et al.* (2002) Critical residues for structure and catalysis in short-chain dehydrogenases/reductases. *J Biol Chem* 277(28):25677-25684.
14. Krishnakumar AM, Nocek BP, Clark DD, Ensign SA, & Peters JW (2006) Structural basis for stereoselectivity in the (R)- and (S)-hydroxypropylthioethanesulfonate dehydrogenases. *Biochemistry* 45(29):8831-8840.
15. Sliwa DA, Krishnakumar AM, Peters JW, & Ensign SA (2010) Molecular basis for enantioselectivity in the (R)- and (S)-hydroxypropylthioethanesulfonate dehydrogenases, a unique pair of stereoselective short-chain dehydrogenases/reductases involved in aliphatic epoxide carboxylation. *Biochemistry* 49(16):3487-3498.
16. Hudson GA, Zhang Z, Tietz JI, Mitchell DA, & van der Donk WA (2015) In vitro biosynthesis of the core scaffold of the thiopeptide thiomuracin. *J Am Chem Soc* 137(51):16012-16015.
